# Supplementary material
Source: PubMed Central journal article supplement (PMC6366861)
Supplement: NIHMS1511130-supplement-Supplementary_Figures_and_Tables.pdf [file NIHMS1511130-supplement-Supplementary_Figures_and_Tables.pdf]

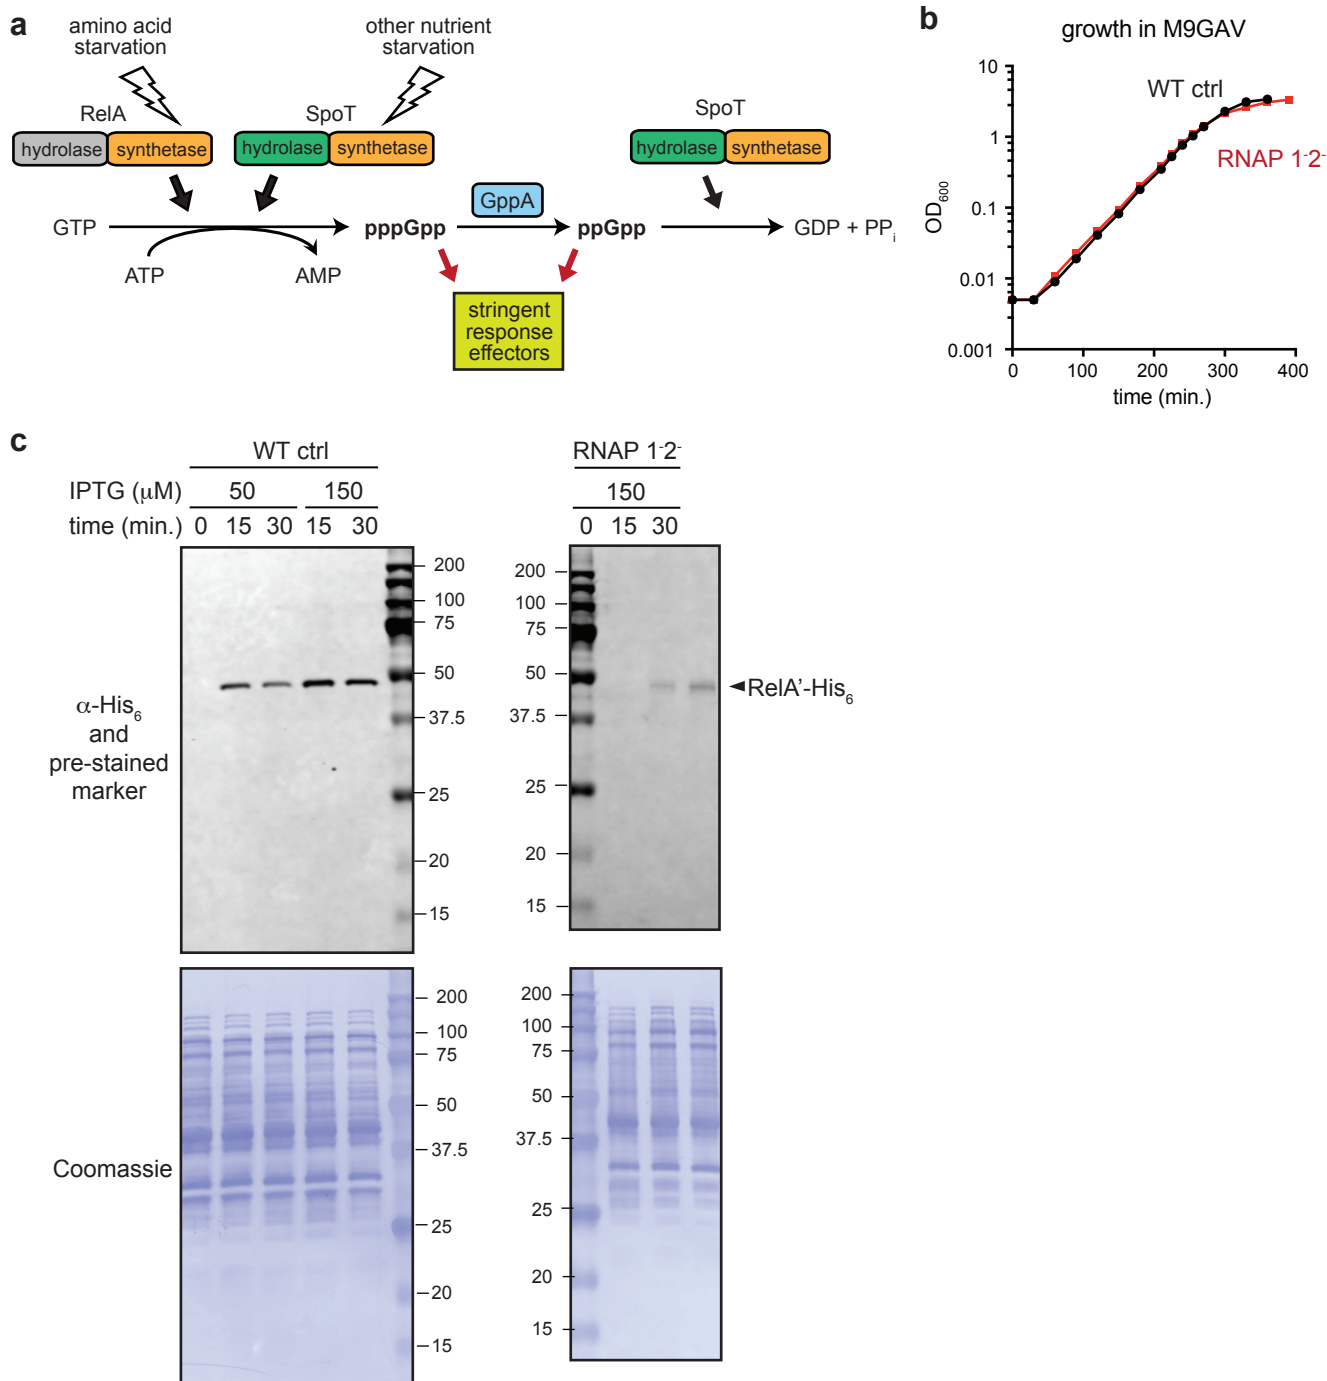

**Supplementary Figure 1. Growth of the RNAP 1-2- strain and its expression of RelA'.**

(a) Schematic of enzymatic activities governing (p)ppGpp levels in *E. coli*. RelA and SpoT can each synthesize pppGpp in response to various signals. SpoT also has an active hydrolase domain; the hydrolase domain in RelA is non-functional.

(b) Growth of the WT control and the RNAP 1-2- strains in M9GAV medium. One representative growth curve from three experiments is shown.

(c) Western blot for RelA'-His<sub>6</sub> expressed in the WT control and RNAP 1-2- strains for the times indicated with RelA'-His<sub>6</sub> induced with the concentration of IPTG indicated. The corresponding Coomassie stained gel indicating loading is shown below.

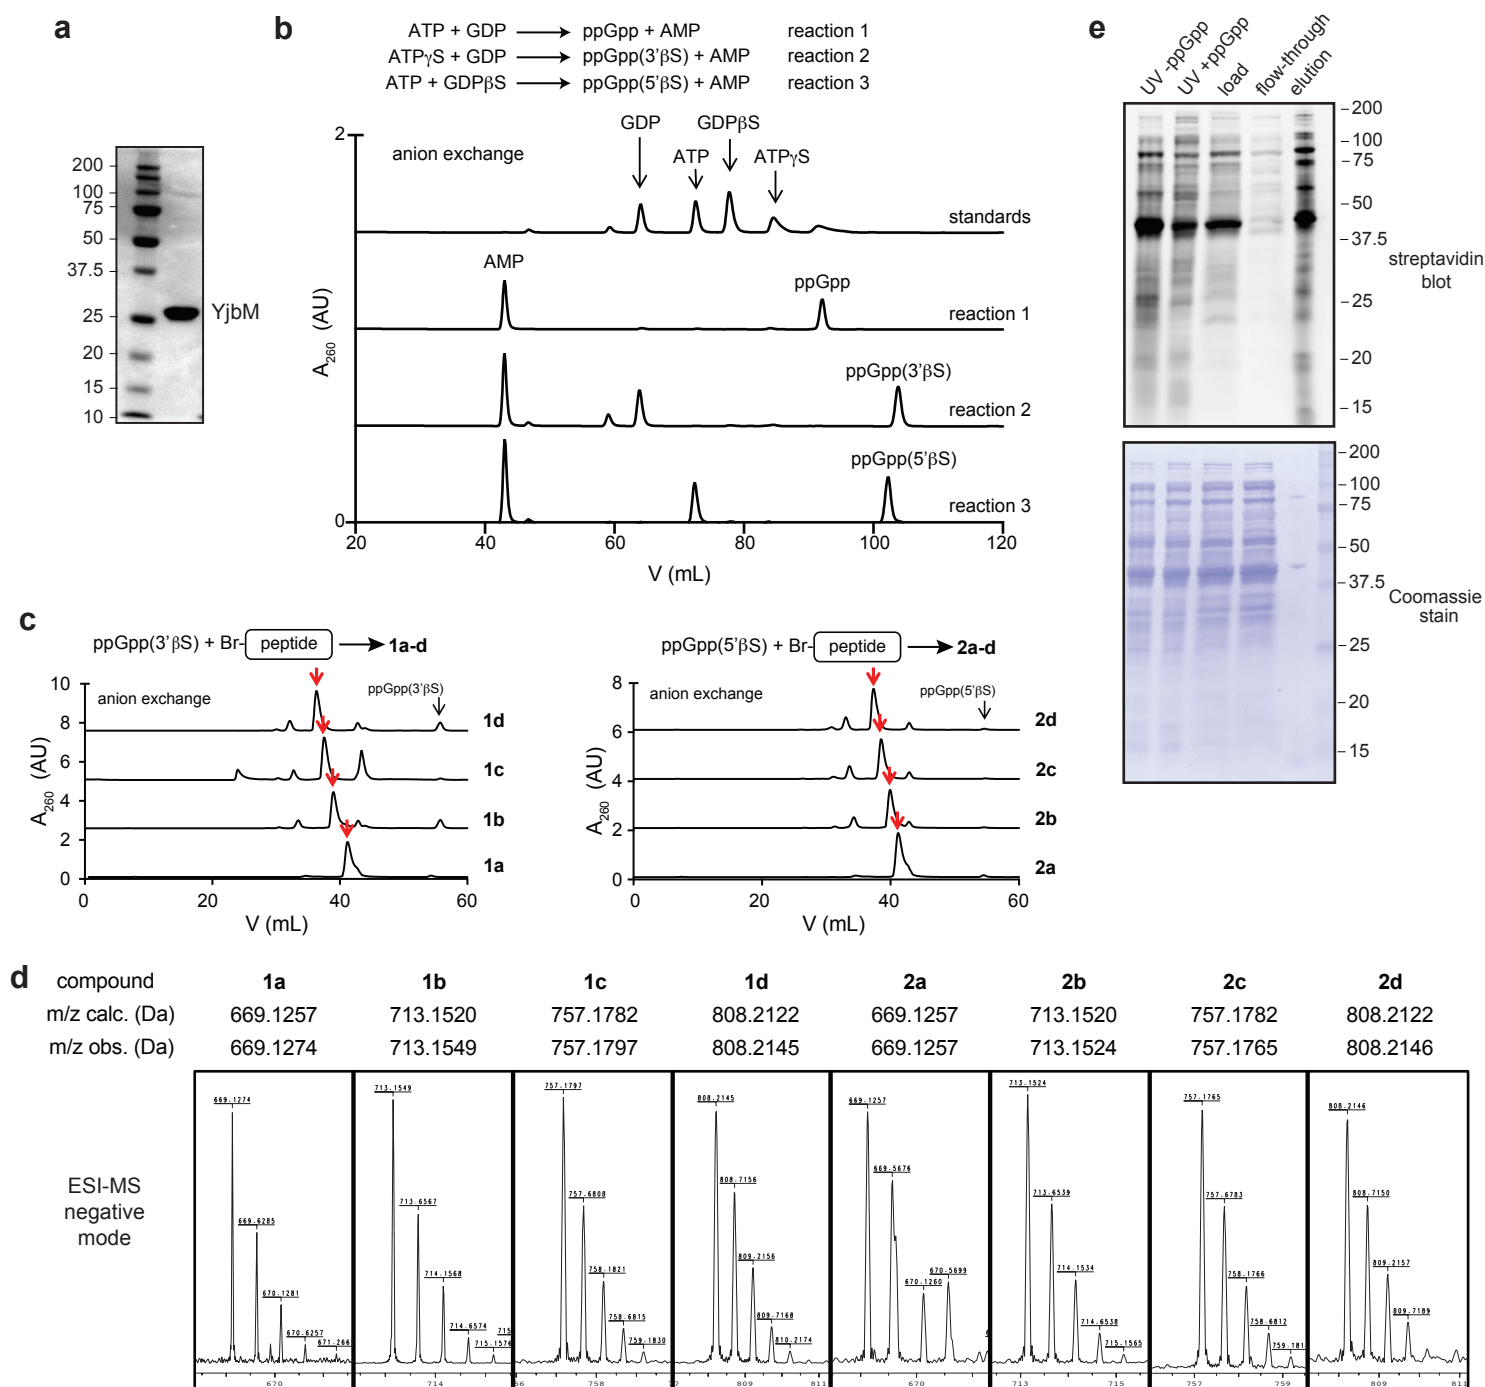

### Supplementary Figure 2. Synthesis of crosslinkable ppGpp derivatives.

(a) Coomassie stained gel indicating the purity of YjbM enzyme used to synthesize ppGpp, ppGpp(3' $\gamma$ S), and ppGpp(5' $\gamma$ S).  
 (b) Anion-exchange chromatography traces for reactions producing ppGpp, ppGpp(3' $\gamma$ S), and ppGpp(5' $\gamma$ S). The top trace was from a mixture of starting materials.

(c) Anion-exchange chromatography traces for conjugation reactions producing **1a-d** (left) and **2a-d** (right). Red arrows indicate desired compounds listed on the far right and shown in Fig. 2a.

(d) High-resolution mass spectra for the 8 crosslinkable ppGpp compounds **1a-d** and **2a-d**. The calculated and observed m/z in Da are listed above each spectrum.

(e) Streptavidin blot (top) and Coomassie brilliant blue staining (bottom) for post-crosslinking lysates (left two lanes) and fractions from streptavidin pull-down (right three lanes).

a

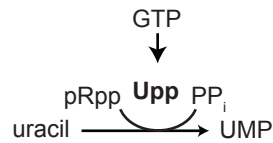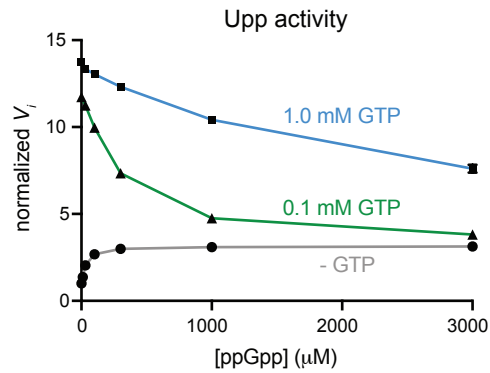

b

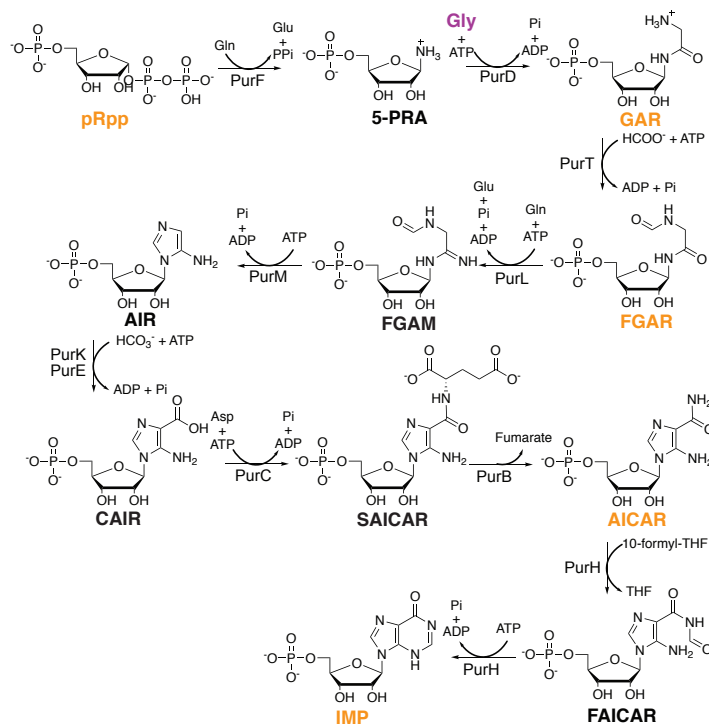

**Supplementary Figure 3. Regulation of Upp by ppGpp and summary of de novo purine nucleotide synthesis pathway.**

(a) Upp produces UMP from pRpp and uracil, and is activated by GTP (top). Upp activity in the presence of ppGpp and GTP at the concentrations indicated (bottom). Data points represent mean of two kinetic experiments.

(b) Metabolic pathway for *de novo* synthesis of IMP, the precursor to ATP and GTP, from pRpp. Metabolites listed in orange were reliably detected by metabolomics (see Fig. 4c, 5e). Glycine, which was used for isotopic labeling of purines, is highlighted in purple.

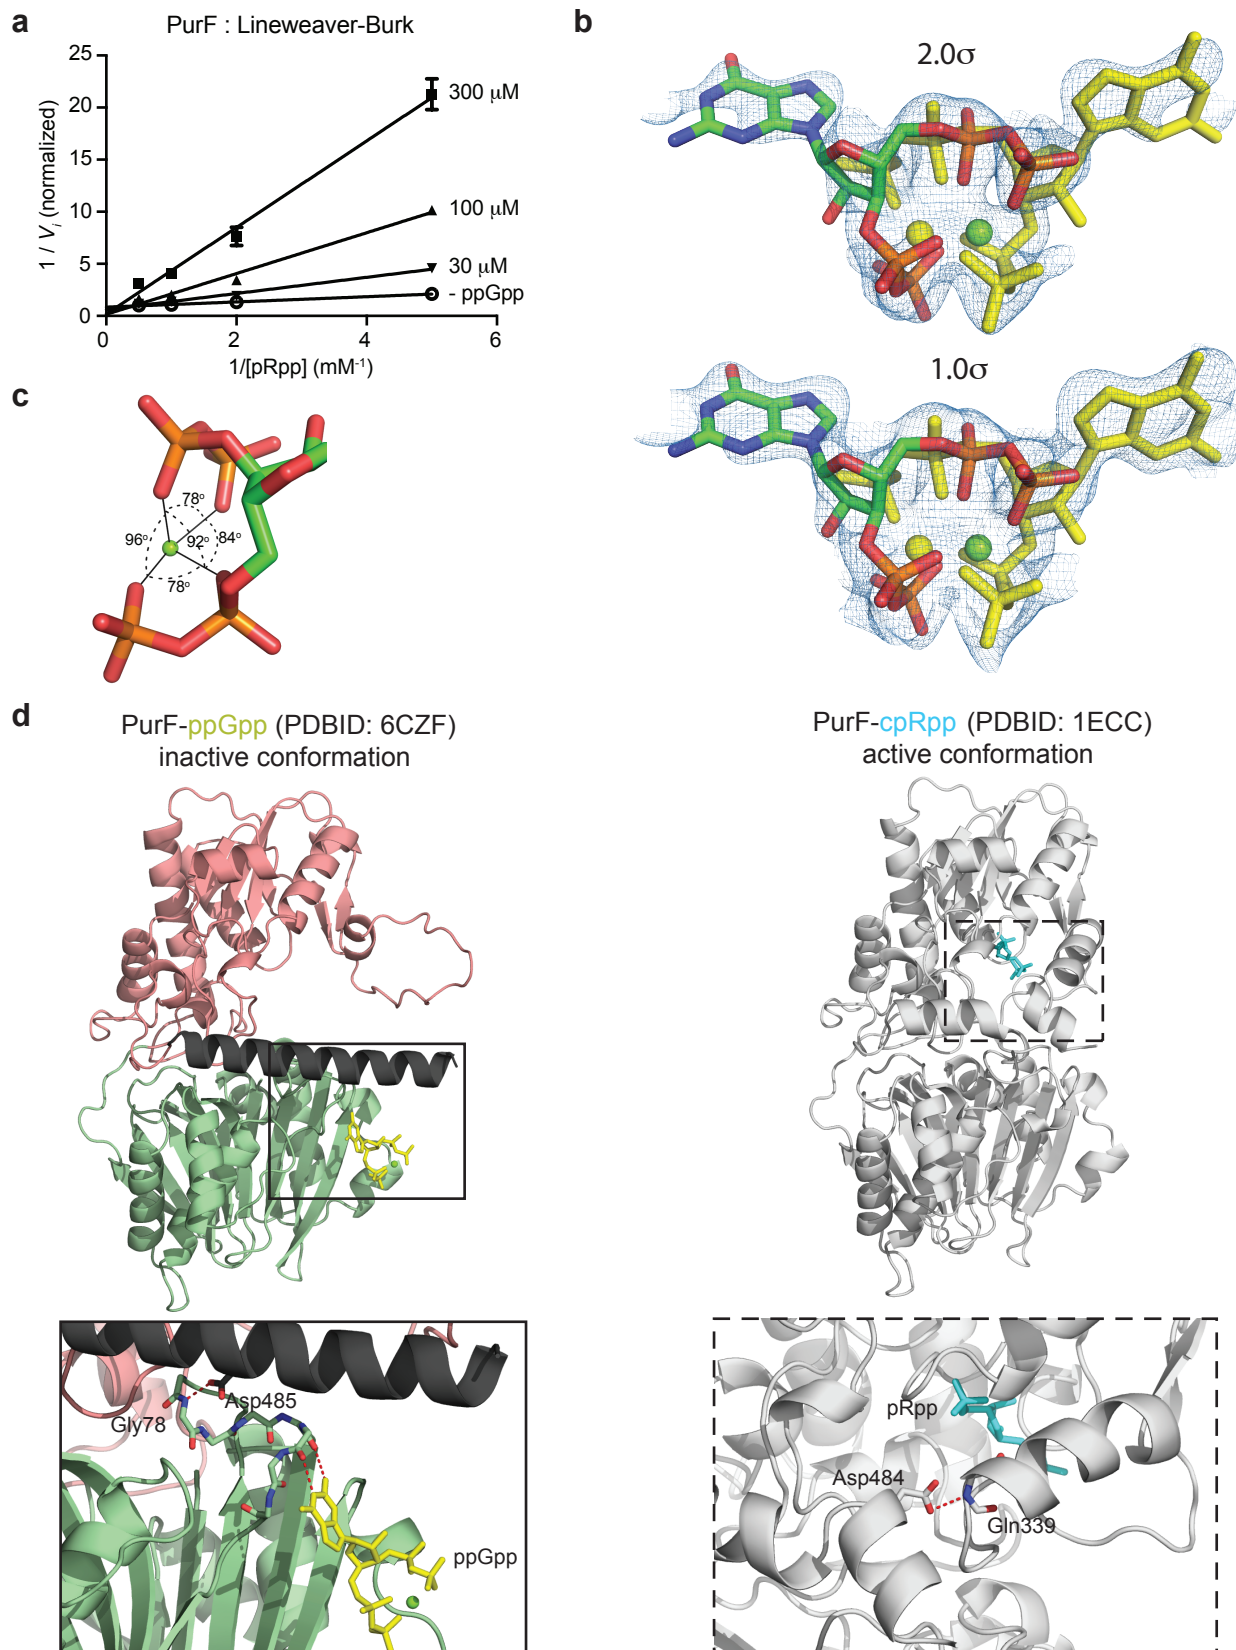

**Supplementary Figure 4. Structural changes induced by ppGpp binding to PurF.**

(a) Lineweaver-Burk analysis showing that ppGpp is a competitive PurF inhibitor with respect to pRpp. Points represent mean of two independent experiments with bars indicating range.

(b) Fo–Fc omit electron density of ppGpp (blue mesh) contoured at  $2\sigma$  (left) and  $1\sigma$  (right), each overlaid with stick model of ppGpp-Mg in two orientations, one colored by element and the other in yellow. Also see Online Methods for details of modeling.

(c) Configuration of ppGpp coordinating a  $Mg^{2+}$  ion in the PurF-ppGpp structure. All O-Mg-O bond angles displayed should be  $90^\circ$  in an ideal octahedral coordination.

(d) Zoom-in views of key contacts involving the C-terminal helix of PurF in the ppGpp-bound conformation (left) and the cpRpp-bound conformation (right).



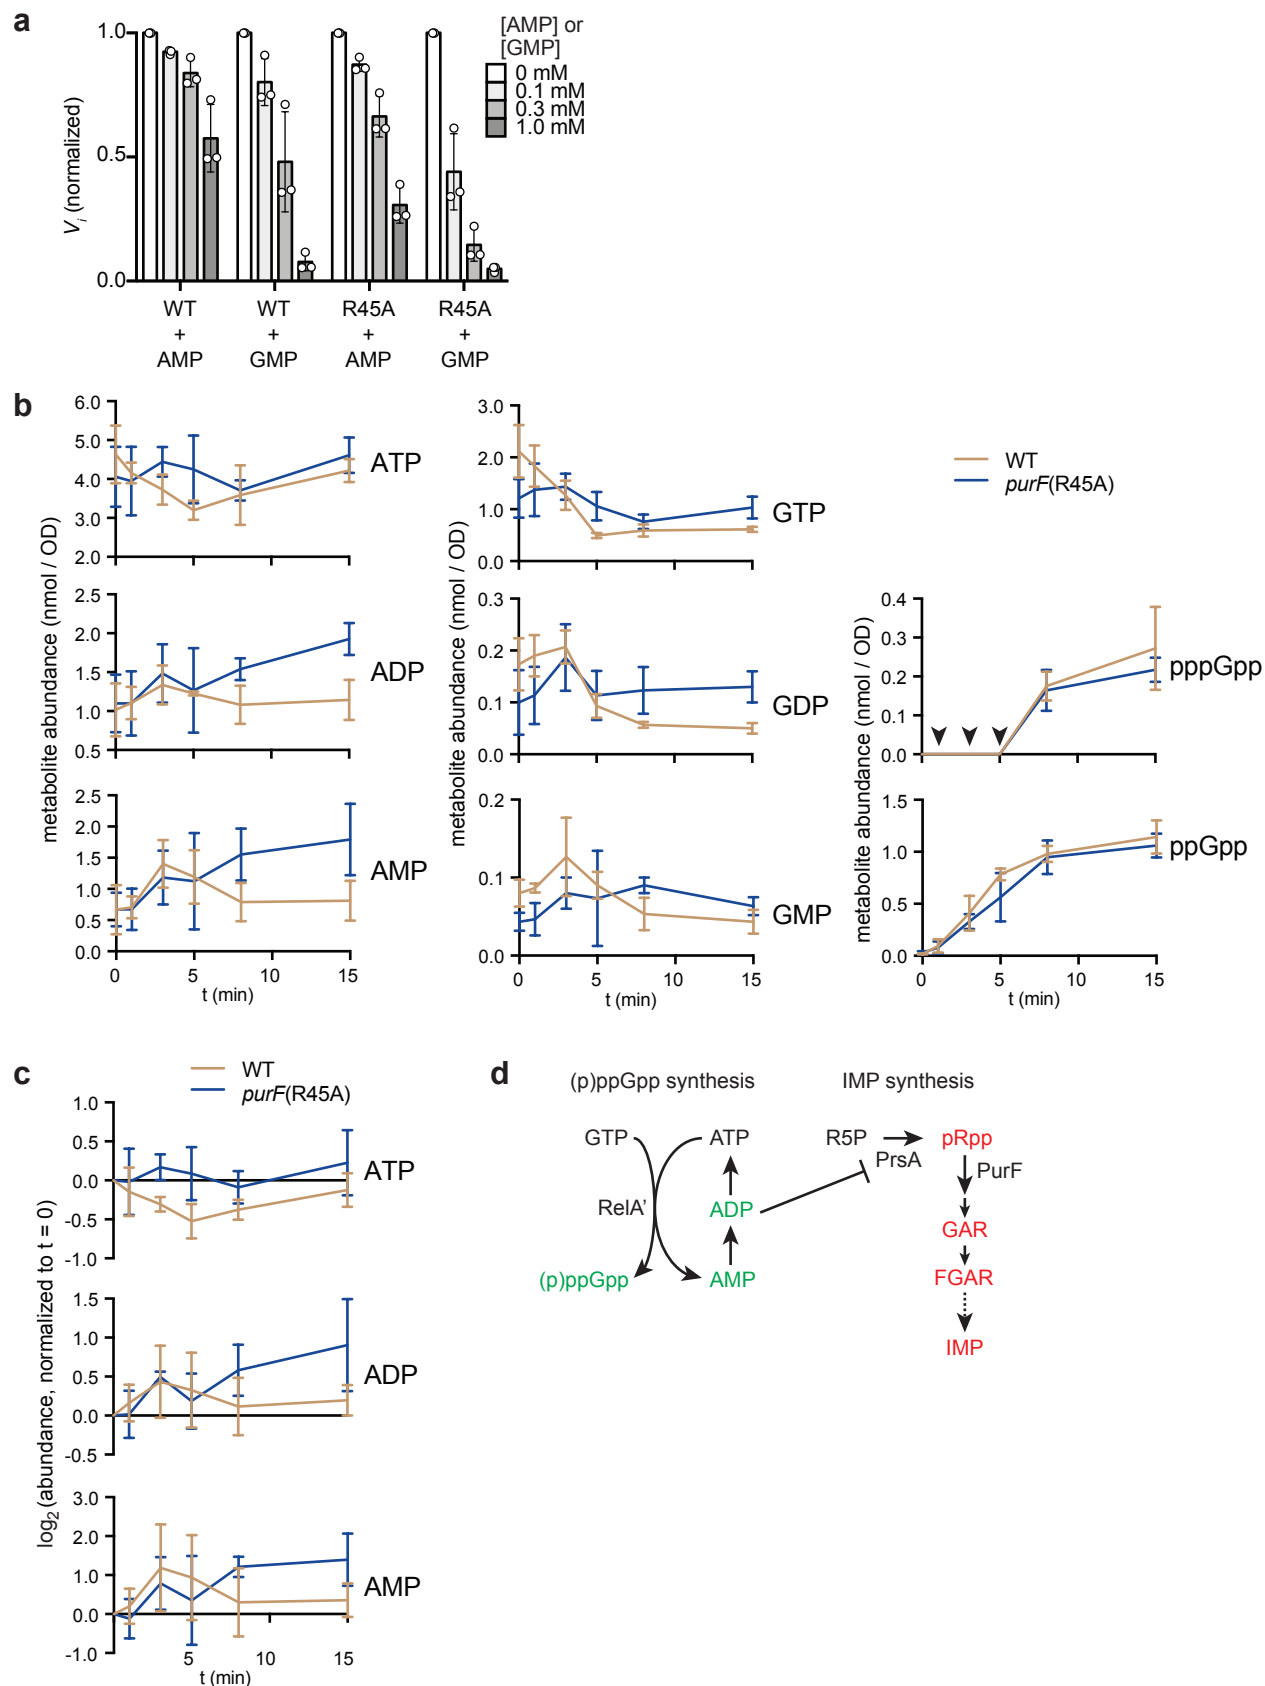

**Supplementary Figure 5. Additional characterizations of PurF(R45A).**

(a) Activity of WT PurF or PurF(R45A) in the presence of indicated concentrations of AMP or GMP. Initial velocities of each reaction were normalized to that of WT PurF without ligand. Error bars indicate S.D., n=3.

(b-c) Time courses of net abundance changes of all adenosine and guanosine nucleotides (b) and fold changes of adenosine nucleotides (c) in WT and *purF(R45A)* strains grown in M9GAV after inducing pRelA' with 40  $\mu$ M IPTG. Error bars indicate S.D, n=3. Arrowheads in (b) indicate not detectable.

(d) Scheme showing the PurF-independent effects of ppGpp on the *de novo* synthesis of IMP. Metabolites increased (green) or decreased (red) early following RelA' induction are highlighted.

**Supplementary Dataset. SILAC mass spectrometry results**

For each protein, the H / L ratio, number of total peptides, and number of unique peptides is shown for each of three capture-ID experiments. Entries shaded grey are proteins predicted to be secreted. Entries shaded orange were purified and studied with ITC (see Supplementary Table 2)

**Supplementary Table 1. Previously characterized ppGpp-binding proteins in *E. coli***

| protein | function / annotation                        | ID'd here? | characterization                                                               | reference |
|---------|----------------------------------------------|------------|--------------------------------------------------------------------------------|-----------|
| SpeC    | ornithine decarboxylase                      | Y          | inhibition and binding (ITC) <i>in vitro</i>                                   | 1         |
| Gpt     | xanthine-guanine phosphoribosyltransferase   | Y          | inhibition <i>in vitro</i>                                                     | 2         |
| GdhA    | glutamate dehydrogenase                      | Y          | binding (microdialysis) <i>in vitro</i>                                        | 3         |
| Upp     | uracil phosphoribosyltransferase             | Y          | inhibition <i>in vitro</i><br>activation <i>in vitro</i> with low GTP          | 4<br>5    |
| Hpt     | hypoxanthine phosphoribosyltransferase       | Y          | inhibition <i>in vitro</i>                                                     | 2         |
| PurA    | adenylosuccinate synthetase                  | Y          | inhibition of partially purified protein <i>in vitro</i>                       | 6         |
| EF-G    | elongation factor G                          | Y          | binding (ITC) <i>in vitro</i><br>inhibition of translation <i>in vitro</i>     | 7<br>8    |
| Der     | ribosome-associated GTPase                   | Y          | binding <i>in vitro</i>                                                        | 9         |
| IF-2    | translation initiation factor 2, GTPase      | Y          | binding (ITC) <i>in vitro</i><br>inhibition <i>in vitro</i>                    | 7<br>10   |
| EF-Tu   | translation elongation factor Tu             | Y          | binding (ITC) <i>in vitro</i><br>inhibition of translation <i>in vitro</i>     | 7<br>17   |
| BipA    | ribosome biogenesis GTPase                   | Y          | binding (ITC) <i>in vitro</i> + structure                                      | 11        |
| Ppx     | exopolyphosphatase                           | Y          | inhibition <i>in vitro</i> , polyP accumulation <i>in vivo</i>                 | 12        |
| GuaB    | inosine-5'-monophosphate dehydrogenase       | Y          | inhibition <i>in vitro</i>                                                     | 6         |
| ObgE    | GTPase, putative ribosome disassembly factor | Y          | inhibition <i>in vitro</i>                                                     | 13        |
| HisG    | ATP phosphoribosyltransferase                | N          | inhibition <i>in vitro</i>                                                     | 14        |
| LdcC    | lysine decarboxylase 2                       | N          | inhibition <i>in vitro</i>                                                     | 1         |
| LdcI    | lysine decarboxylase 1                       | N          | inhibition <i>in vitro</i> + structure                                         | 15        |
| DksA    | RNA polymerase-binding transcription factor  | Y          | inhibition <i>in vitro</i><br>RNAP 1'2' strain defective in nutritional shifts | 16<br>17  |
| RpoC    | RNA polymerase subunit $\beta'$              | N          | structure                                                                      | 18        |
| RpoZ    | RNA polymerase subunit $\omega$              | N          | RNAP 1'2' strain defective in nutritional shifts                               | 17        |
| SpoT    | bifunctional ppGpp synthase/hydrolase        | Y          | overexpression reduces ppGpp <i>in vivo</i>                                    | 19        |
| DnaG    | DNA primase                                  | N          | inhibited <i>in vitro</i>                                                      | 20        |
| YgdH    | nucleotide 5'-monophosphate nucleosidase     | N          | DRaCALA                                                                        | 21        |
| RF-3    | peptide chain release factor 3, GTPase       | Y          | DRaCALA                                                                        | 21        |
| Era     | ribosome biogenesis GTPase                   | Y          | DRaCALA                                                                        | 21        |
| EF-4    | translation elongation factor 4              | Y          | DRaCALA                                                                        | 21        |
| RsgA    | ribosome biogenesis GTPase                   | Y          | DRaCALA                                                                        | 21        |
| HypB    | hydrogenase isozymes nickel incorp. protein  | N          | DRaCALA                                                                        | 21        |

**Supplementary Table 2. Summary of exposed (p)ppGpp termini in crystal structures**

| PDBID | resolution (Å) | (p)ppGpp | species               | protein   | solvent-exposed terminal P <sub>i</sub>                    | reference |
|-------|----------------|----------|-----------------------|-----------|------------------------------------------------------------|-----------|
| 2J4R  | 2.7            | ppGpp    | <i>A. aeolicus</i>    | GppA      | 5'                                                         | 22        |
| 1LNZ  | 2.6            | ppGpp    | <i>B. subtilis</i>    | Obg       | 3' and 5'                                                  | 23        |
| 3VR1  | 2.8            | ppGpp    | <i>D. vulgaris</i>    | RF3       | 3'                                                         | 24        |
| 4ZCM  | 3.3            | ppGpp    | <i>E. coli</i>        | BipA      | 3'                                                         | 11        |
| 5A9Y  | 4.0            | ppGpp    | <i>E. coli</i>        | BipA      | 3'                                                         | 25        |
| 3N75  | 2.0            | ppGpp    | <i>E. coli</i>        | Ldcl      | 3' and 5'                                                  | 15        |
| 4JK1  | 3.9            | ppGpp    | <i>E. coli</i>        | RNAP      | 5'                                                         | 26        |
| 4JKR  | 4.2            | ppGpp    | <i>E. coli</i>        | RNAP      | 3' and 5'                                                  | 18        |
| 5VSW  | 4.3            | ppGpp    | <i>E. coli</i>        | RNAP-DksA | 3' and 5' (chain E)<br>3' and 5' (chain J)<br>3' (chain M) | 26        |
| 5U51  | 3.0            | ppGpp    | <i>F. tularensis</i>  | MglA-SspA | 3' and 5'                                                  | 27        |
| 5VOG  | 1.5            | ppGpp    | <i>N. gonorrhoeae</i> | Hpt       | 3'                                                         | N/A       |
| 4EDT  | 2.0            | ppGpp    | <i>S. aureus</i>      | DnaG      | 3' and 5'                                                  | 28        |
| 5DED  | 2.9            | pppGpp   | <i>B. subtilis</i>    | YjbM      | 3' and 5'                                                  | 29        |
| 4JK2  | 4.2            | pppGpp   | <i>E. coli</i>        | RNAP      | 5'                                                         | 18        |
| 4EDV  | 2.0            | pppGpp   | <i>S. aureus</i>      | DnaG      | 3' and 5'                                                  | 28        |
| 4QRH  | 1.6            | pppGpp   | <i>S. aureus</i>      | Gmk       | 5'                                                         | 30        |

**Supplementary Table 3. Binding of ppGpp to purified metabolic enzymes**

| Protein | Function / Annotation                              | #subunits | # binding sites | $K_D$ ( $\mu$ M)     | % activity<br>+ 1 mM ppGpp |
|---------|----------------------------------------------------|-----------|-----------------|----------------------|----------------------------|
| Gsk     | inosine-guanosine kinase                           | 2         | 2 <sup>^</sup>  | 0.4 ± 0.07<br>14 ± 2 | 9 ± 1                      |
| SpeC    | ornithine decarboxylase                            | 2         | 1.14 ± 0.004    | 1.6 ± 0.05           | 1.6 ± 0.2                  |
| PurF    | glutamine amidophosphoribosyltransferase           | 4         | 2.13 ± 0.005    | 1.6                  | 8 ± 2                      |
| GdhA    | glutamate dehydrogenase                            | 6         | 2 <sup>^</sup>  | 2.8 ± 0.4<br>29 ± 2  | 119                        |
| Gpt     | xanthine-guanine phosphoribosyltransferase         | 2         | 1.02 ± 0.002    | 3.2 ± 0.05           | 13 ± 5                     |
| Hpt     | hypoxanthine phosphoribosyltransferase             | 2         | 0.97 ± 0.03     | 32 ± 4               | 4 ± 1                      |
| Upp     | uracil phosphoribosyltransferase                   | 2         | 2.98 ± 0.04     | 47 ± 3               | 76 ± 1                     |
| PurA    | adenylosuccinate synthetase                        | 2         | 2.02 ± 0.03     | 61 ± 4               | 75 ± 2                     |
| GpmA    | phosphoglycerate mutase                            | 2         | 2 <sup>^</sup>  | 52 ± 3               | 147                        |
| Cmk     | cytidylate kinase                                  | 1         | 1 <sup>^</sup>  | 79 ± 1               | 111                        |
| FolC    | dihydrofolate synthase                             | 1         | 1 <sup>^</sup>  | 130 ± 3              | N.T.                       |
| Icd     | isocitrate dehydrogenase                           | 2         | 1 <sup>^</sup>  | 132 ± 5              | 96 ± 1                     |
| Gnd     | 6-phosphogluconate dehydrogenase                   | 2         | 1 <sup>^</sup>  | 175 ± 3              | 114 ± 1                    |
| Pgk     | phosphoglycerate kinase                            | 1         | 1 <sup>^</sup>  | 493 ± 30             | 85                         |
| Mpl     | UDP-MurNAc--L-Ala- $\gamma$ -D-Glu-meso-DAP ligase | 1         | 1 <sup>^</sup>  | 752 ± 46             | N.T.                       |
| PurC    | SAICAR synthase                                    | 3         | N.D.            | N.D.                 | N.T.                       |
| PurB    | adenylosuccinate lyase                             | 4         | N.D.            | N.D.                 | N.T.                       |
| GuaB    | inosine 5'-monophosphate dehydrogenase             | 4         | N.D.            | N.D.                 | 106 ± 5                    |

red = new hits

<sup>^</sup> number of sites was fixed rather than inferred from fitted ITC data

ITC errors are fitting errors from one binding isotherm.

Activity errors are range of two replicates.

N.D. = no detectable heat release by ITC

N.T. = not tried



**Supplementary Table 4. Data collection and refinement statistics for the PurF-ppGpp structure**

---

| PDB: 6CZF                                           |                                               |
|-----------------------------------------------------|-----------------------------------------------|
| <b>Data collection</b>                              |                                               |
| Space group                                         | P2 <sub>1</sub> 2 <sub>1</sub> 2 <sub>1</sub> |
| Cell dimensions                                     |                                               |
| <i>a</i> , <i>b</i> , <i>c</i> (Å)                  | 107.29, 115.34, 156.07                        |
| $\alpha$ , $\beta$ , $\gamma$ (°)                   | 90, 90, 90                                    |
| Resolution (Å)                                      | 48.6-1.95 (1.98-1.95)                         |
| <i>R</i> <sub>sym</sub>                             | 0.087 (1.49)                                  |
| <i>I</i> / $\sigma$ ( <i>I</i> )                    | 10.9 (0.70)                                   |
| Completeness (%)                                    | 99.9 (99.0)                                   |
| Redundancy                                          | 6.4 (5.8)                                     |
| <b>Refinement</b>                                   |                                               |
| Resolution (Å)                                      | 1.95                                          |
| No. reflections                                     | 140,744                                       |
| <i>R</i> <sub>work</sub> / <i>R</i> <sub>free</sub> | 0.2163 (0.371) / 0.2409 (0.431)               |
| No. atoms                                           |                                               |
| Protein                                             | 15577                                         |
| Ligand/ion                                          | 148*                                          |
| Water                                               | 380                                           |
| <i>B</i> -factors                                   |                                               |
| Protein                                             | 47.68                                         |
| Ligand/ion                                          | 36.01*                                        |
| Water                                               | 44.27                                         |
| R.m.s. deviations                                   |                                               |
| Bond lengths (Å)                                    | 0.006                                         |
| Bond angles (°)                                     | 0.993                                         |

---

Highest-resolution shell is shown in parentheses.

\* half occupancy atoms: B-factor weighed by occupancy

**Supplementary Table 5. DNA oligos**

| <b>Primer name</b> | <b>Sequence</b>                                                                                    |
|--------------------|----------------------------------------------------------------------------------------------------|
| G23-1 K46:Kan FP   | GCC GGC ATC ATC ACC ATA GAT GCC AAT AAC TGC TTC CGT TTG CGT AAA GAA<br>CTT CAA GAT CCC CTC ACG CTG |
| G23-1 K46:Kan RP   | CGC TGC ATA TGG CGA GCT TCA AAT ACA TCG CTC ACC AGC CCG TTC GCT TCA<br>GAG CGC TTT TGA AGC TGG GG  |
| G23-1 R45A Rec     | GAT GCC AAT AAC TGC TTC CGT TTG GCT AAA GCG AAC GGG CTG GTG AGC GAT<br>GTA TTT G                   |
| RelA D275G FP      | GAT GAG CTG TTT GGT GTG CGT GCG                                                                    |
| RelA D275G RP      | CGC ACG CAC ACC AAA CAG CTC ATC                                                                    |
| pTac EcoRI RP      | CTG TTT CCT GTG TGA AAT TGT TAT CC                                                                 |
| pTac HindIII FP    | AAG CTT GGC TGT TTT GGC GGA TG                                                                     |
| pET30 Sumo RP      | ACC ACC AAT CTG TTC TCT GTG AGC                                                                    |
| pET30 EcoRI FP     | GAA TTC GAG CTC CGT CGA CAA G                                                                      |
| pCfa NdeI RP       | CAC GAA GAT CTG CAT ATG TAT ATC TCC TTC                                                            |
| pCfa Cys FP        | TGC CTG TCT TAC GAC ACA GAG                                                                        |
| G1-2 5' NdeI       | CCT GGT GCC GCG CGG CAG CCA TAT GGA TGA CAA ACA ATG GGA GCG                                        |
| G1-2 3' XhoI       | GTG GTG GTG GTG GTG GTG CTC GAG CTA TTG TTG CTC GCT TCC TTT TTT CTT<br>TC                          |
| G9-1 5' NdeI       | CCT GGT GCC GCG CGG CAG TCA TAT GTC CAA GCA ACA GAT CGG C                                          |
| G9-1 3' XhoI       | GTG GTG GTG GTG GTG GTG CTC GAG TTA ATC CAG CCA TTC GGT ATG GAA C                                  |
| G10-1 5' NdeI      | CCT GGT GCC GCG CGG CAG CCA TAT GGA TCA GAC ATA TTC TCT GGA GTC                                    |
| G10-1 3' XhoI      | GTG GTG GTG GTG GTG GTG CTC GAG TTA AAT CAC ACC CTG CGC CAG                                        |
| G13-1 5' NdeI      | CCT GGT GCC GCG TGG TAG CCA TAT GGG GCA GGG TTT TCC AC                                             |
| G13-1 3' XhoI      | GTG GTG GTG GTG GTG GTG CTC GAG TTA CTT CAA CAC ATA ACC GTA CAA CC                                 |
| G15-1 5' NdeI      | CCT GGT GCC GCG CGG CAG CCA TAT GAT TAT CAA ACG CAC TCC TCA AG                                     |
| G15-1 3' XhoI      | GTG GTG GTG GTG GTG GTG CTC GAG CCG ATT CTG AAA CTT ACT TGC CAC                                    |
| G19-1 5' NdeI      | CCT GGT GCC GCG CGG CAG CCA TAT GAG CGA AAA ATA CAT CGT CAC C                                      |
| G19-1 3' XhoI      | GTG GTG GTG GTG GTG GTG CTC GAG TTA GCG ACC GGA GAT TGG C                                          |
| G20-1 5' NdeI      | CCT GGT GCC GCG CGG CAG CCA TAT GAA ACA TAC TGT AGA AGT AAT GAT CCC<br>C                           |
| G20-1 3' XhoI      | GTG GTG GTG GTG GTG GTG CTC GAG TTA CTC GTC CAG CAG AAT CAC TTT G                                  |
| G21-1 5' NdeI      | CCT GGT GCC GCG CGG CAG CCA TAT GAA GAT CGT GGA AGT CAA ACA CC                                     |
| G21-1 3' XhoI      | GTG GTG GTG GTG GTG GTG CTC GAG TTA TTT CGT ACC AAA GAT TTT GTC ACC<br>G                           |
| G23-1 5' NcoI      | GTT TAA CTT TAA GAA GGA GAT ATA CCA TGT GCG GTA TTG TCG GTA TCG                                    |
| G23-1 3' XhoI      | GTG GTG GTG GTG GTG GTG CTC GAA AAG GCA TCA TCC TTC GTT ATG C                                      |
| G23-1 5' NdeI Cfa  | CTT TAA GAA GGA GAT ATA CAT ATG TGC GGT ATT GTC GGT ATC G                                          |
| G23-1 3' Cfa       | CTC TGT GTC GTA AGA CAG GCA TCC TTC GTT ATG CAT TTC GAG ATT TTC                                    |
| G24-1 5' NdeI      | CCT GGT GCC GCG CGG CAG CCA TAT GAA ATT TCC CGG TAA ACG TAA ATC C                                  |
| G24-1 3' XhoI      | GTG GTG GTG GTG GTG GTG CTC GAG TTA ACG ATC CCA GTA AGA CTC TTC CAG                                |
| G25-1 5' Sumo      | CAC AGA GAA CAG ATC GGT GGT GCT ACC AAT GCA AAA CCC GTC                                            |
| G25-1 3' EcoRI     | CTT GTC GAC GGA GCT CGA ATT CGA ATT ATT CCG TGA TTA AAG TCC CTT CTT<br>TTT C                       |
| G26-1 5' NdeI      | CCT GGT GCC GCG CGG CAG CCA TAT GAC TGC AAT TGC CCC GGT TAT TAC                                    |
| G26-1 3' XhoI      | GTG GTG GTG GTG GTG GTG CTC GAG TAC TGC AAA TTC GGT CGC TTA TGC                                    |
| G27-1 5' NcoI      | GTT TAA CTT TAA GAA GGA GAT ATA CCA TG GGT AAC AAC GTC GTC GTA CTG G                               |
| G27-1 3' XhoI      | GTG GTG GTG GTG GTG GTG CTC GAG TAC CAG AAT TAC GCG TCG AAC G                                      |
| G28-1 5' NdeI      | CCT GGT GCC GCG TGG TAG CCA TAT GGA ATT ATC CTC ACT GAC CGC                                        |
| G28-1 3' XhoI      | GTG GTG GTG GTG GTG GTG CTC GAG TTT ATT TCA GCT CAT CAA CCA TCG TG                                 |
| G29-1 5' NdeI      | CCT GGT GCC GCG CGG CAG CCA TAT GCA AAA GCA AGC TGA GTT GTA TCG                                    |
| G29-1 3' XhoI      | GTG GTG GTG GTG GTG GTG CTC GAG AAC AGA AAA ATC AGT CCA GCT GTA<br>CAC                             |
| G30-1 5' Sumo      | CAC AGA GAA CAG ATT GGT GGT ATG CTA AGA ATC GCT AAA GAA GCT CTG                                    |
| G30-1 3' EcoRI     | CTT GTC GAC GGA GCT CGA ATT CTC AGG AGC CCA GAC GGT AG                                             |
| G43-1 5' NdeI      | CCT GGT GCC GCG CGG CAG TCA TAT GGA AAG TAA AGT AGT TGT TCC GGC                                    |
| G43-1 3' XhoI      | GTG GTG GTG GTG GTG GTG CTC GAG TTA CAT GTT TTC GAT GAT CGC GTC AC                                 |
| G45-1 5' NdeI      | CCT GGT GCC GCG CGG CAG CCA TAT GTC TGT AAT TAA GAT GAC CGA TCT GG                                 |
| G45-1 3' XhoI      | GTG GTG GTG GTG GTG GTG CTC GAG TGA TTT TTT ACT TCT TAG CGC GCT C                                  |

|               |                                                                    |
|---------------|--------------------------------------------------------------------|
| G46-1 5' Ndel | CCT GGT GCC GCG CGG CAG TCA TAT GGC TGT AAC TAA GCT GGT TCT G      |
| G46-1 3' Xhol | GTG GTG GTG GTG GTG GTG CTC GAG AAT GAC GTT TAC TTC GCT TTA CCC    |
| G53-1 5' Ndel | CCT GGT GCC GCG CGG CAG CCA TAT GCG CAT TCA TAT TTT AGG AAT TTG TG |
| G53-1 3' Xhol | GTG GTG GTG GTG GTG GTG CTC GAG AAT TAC TGC GCG GCT TCC G          |
| G55-1 5' Ndel | CCT GGT GCC GCG TGG CAG TCA TAT GAA AGT ATT AGT GAT TGG TAA CGG C  |
| G55-1 3' Xhol | GTG GTG GTG GTG GTG GTG CTC GAG TTA GTT CTG CTC GCG TTC G          |
| G61-1 5' Ndel | CCT GGT GCC GCG CGG CAG TCA TAT GGC TAT TGA ACG TAC TTT TTC CAT C  |
| G61-1 3' Xhol | GTG GTG GTG GTG GTG GTG CTC GAG AAA TTA TTA ACG GGT GCG CGG G      |
| G62-15' Ndel  | CCT GGT TCC GCG CGG CAG TCA TAT GGC TCA AGG CAC GCT TTA TAT TG     |
| G62-1 3' Xhol | GTG GTG GTG GTG GTG GTG CTC GAG TTC AGT CTG CCA ACA ATT TGC TG     |
| G23-1 R45A FP | CGT TTG GCT AAA GCG AAC GGG CTG GTG                                |
| G23-1 R45A RP | CCG TTC GCT TTA GCC AAA CGG AAG CAG TTA TTG G                      |
| G23-1 N48A FP | CGT TTG CGT AAA GCG GCC GGG CTG GTG AG                             |
| G23-1 N48A RP | CTC ACC AGC CCG GCC GCT TTA CGC AAA CG                             |
| G23-1 R58A FP | GCG ATG TAT TTG AAG CCG CCC ATA TGC AGC GTT TG                     |
| G23-1 R58A RP | CAA ACG CTG CAT ATG GGC TGC TTC AAA TAC ATC GC                     |
| G23-1 H59A FP | GTA TTT GAA GCT CGC GCT ATG CAG CGT TTG CAG                        |
| G23-1 H59A RP | CTG CAA ACG CTG CAT AGC ACG AGC TTC AAA TAC                        |
| G23-1 R62A FP | CCA TAT GCA GGC TTT GCA GGG CAA TAT GGG C                          |
| G23-1 R62A RP | CCC TGC AAA GCC TGC ATA TGG CGA GCT TCA AAT AC                     |
|               |                                                                    |

**Supplementary Table 6. Protein expression vectors**

| Vector backbone | Selection marker       | Relevant features                              | Preparation                                                                                 |
|-----------------|------------------------|------------------------------------------------|---------------------------------------------------------------------------------------------|
| pET-nt          | <i>kan<sup>R</sup></i> | No affinity tag                                | NcoI/XhoI double digestion of pET28b (Novagen)                                              |
| pET28b          | <i>kan<sup>R</sup></i> | N-His <sub>6</sub> tag, thrombin cleavage site | NdeI/XhoI double digestion of pET28b (Novagen)                                              |
| pSumo           | <i>kan<sup>R</sup></i> | N-His <sub>6</sub> -Sumo tag                   | Amplify pET30-His <sub>6</sub> -Sumo-CfaN with primers "pET30 Sumo RP" and "pET30 EcoRI FP" |
| pCfa            | Carb <sup>R</sup>      | C-Cfa-His <sub>6</sub> tag                     | Amplify pTXB1-Ub-Cfa with primers "pCfa NdeI RP" and "pCfa Cys FP"                          |

**Supplementary Table 7. Construction of protein expression plamids**

| Plasmid name | Vector backbone | Insert information |                    |                                  |                |
|--------------|-----------------|--------------------|--------------------|----------------------------------|----------------|
|              |                 | Protein            | Species            | Primers for insert amplification |                |
| pG1-2        | pET28b          | YjbM               | <i>B. subtilis</i> | G1-2 5' NdeI                     | G1-2 3' XhoI   |
| pG9-1        | pET28b          | Gnd                | <i>E. coli</i>     | G9-1 5' NdeI                     | G9-1 3' XhoI   |
| pG10-1       | pET28b          | GdhA               | <i>E. coli</i>     | G10-1 5' NdeI                    | G10-1 3' XhoI  |
| pG13-1       | pET28b          | SpeC               | <i>E. coli</i>     | G13-1 5' NdeI                    | G13-1 3' XhoI  |
| pG15-1       | pET28b          | FolC               | <i>E. coli</i>     | G15-1 5' NdeI                    | G15-1 3' XhoI  |
| pG19-1       | pET28b          | Gpt                | <i>E. coli</i>     | G19-1 5' NdeI                    | G19-1 3' XhoI  |
| pG20-1       | pET28b          | Hpt                | <i>E. coli</i>     | G20-1 5' NdeI                    | G20-1 3' XhoI  |
| pG21-1       | pET28b          | Upp                | <i>E. coli</i>     | G21-1 5' NdeI                    | G21-1 3' XhoI  |
| pG23-1Cfa    | pCfa            | PurF               | <i>E. coli</i>     | G23-1 5' NcoI                    | G23-1 3' XhoI  |
| pG23-1nt     | pET-nt          | PurF               | <i>E. coli</i>     | G23-1 5' NdeI Cfa                | G23-1 3' Cfa   |
| pG24-1       | pET28b          | Gsk                | <i>E. coli</i>     | G24-1 5' NdeI                    | G24-1 3' XhoI  |
| pG25-1Sumo   | pSumo           | PyrH               | <i>E. coli</i>     | G25-1 5' Sumo                    | G25-1 3' EcoRI |
| pG26-1       | pET28b          | Cmk                | <i>E. coli</i>     | G26-1 5' NdeI                    | G26-1 3' XhoI  |
| pG27-1nt     | pET-nt          | PurA               | <i>E. coli</i>     | G27-1 5' NcoI                    | G27-1 3' XhoI  |
| pG28-1       | pET28b          | PurB               | <i>E. coli</i>     | G28-1 5' NdeI                    | G28-1 3' XhoI  |
| pG29-1       | pET28b          | PurC               | <i>E. coli</i>     | G29-1 5' NdeI                    | G29-1 3' XhoI  |
| pG30-1Sumo   | pSumo           | GuaB               | <i>E. coli</i>     | G30-1 5' Sumo                    | G30-1 3' EcoRI |
| pG43-1       | pET28b          | ldh                | <i>E. coli</i>     | G43-1 5' NdeI                    | G43-1 3' XhoI  |
| pG45-1       | pET28b          | Pgk                | <i>E. coli</i>     | G45-1 5' NdeI                    | G45-1 3' XhoI  |
| pG46-1       | pET28b          | GpmA               | <i>E. coli</i>     | G46-1 5' NdeI                    | G46-1 3' XhoI  |
| pG53-1       | pET28b          | Mpl                | <i>E. coli</i>     | G53-1 5' NdeI                    | G53-1 3' XhoI  |
| pG55-1       | pET28b          | PurD               | <i>E. coli</i>     | G55-1 5' NdeI                    | G55-1 3' XhoI  |
| pG61-1       | pET28b          | Ndk                | <i>E. coli</i>     | G61-15' NdeI                     | G61-1 3' XhoI  |
| pG62-1       | pET28b          | Gmk                | <i>E. coli</i>     | G62-15' NdeI                     | G62-1 3' XhoI  |



**Supplementary Table 8. Plasmids**

| Plasmid name                      | Relevant Genotype                                             | Source     |
|-----------------------------------|---------------------------------------------------------------|------------|
| pKD46                             | <i>P<sub>araB</sub>-gam-bet-exo, repA101(ts)</i>              | 31         |
| pKD4                              | FRT: <i>kan<sup>R</sup></i> :FRT                              | 31         |
| pALS13                            | <i>P<sub>Tac</sub>-RelA(1-455)</i>                            | 32         |
| R1-1His                           | <i>P<sub>Tac</sub>-RelA(1-455)-His<sub>8</sub></i>            | This study |
| pET28b                            |                                                               | Novagen    |
| pET30-His <sub>6</sub> -Sumo-CfaN | <i>P<sub>IT</sub>-His<sub>6</sub>-Sumo-CfaN</i>               | 33         |
| pTXB1-Ub-Cfa                      | <i>P<sub>IT</sub>-Ubiquitin-Cfa-His<sub>6</sub></i>           | 33         |
| G1-2                              | <i>P<sub>IT</sub>-His<sub>6</sub>-YjbM<sup>Bst</sup></i>      | This study |
| G9-1                              | <i>P<sub>IT</sub>-His<sub>6</sub>-Gnd<sup>Eco</sup></i>       | This study |
| G10-1                             | <i>P<sub>IT</sub>-His<sub>6</sub>-GdhA<sup>Eco</sup></i>      | This study |
| G13-1                             | <i>P<sub>IT</sub>-His<sub>6</sub>-SpeC<sup>Eco</sup></i>      | This study |
| G15-1                             | <i>P<sub>IT</sub>-His<sub>6</sub>-FolC<sup>Eco</sup></i>      | This study |
| G19-1                             | <i>P<sub>IT</sub>-His<sub>6</sub>-Gpt<sup>Eco</sup></i>       | This study |
| G20-1                             | <i>P<sub>IT</sub>-His<sub>6</sub>-Hpt<sup>Eco</sup></i>       | This study |
| G21-1                             | <i>P<sub>IT</sub>-His<sub>6</sub>-Upp<sup>Eco</sup></i>       | This study |
| G23-1Cfa                          | <i>P<sub>IT</sub>-PurF<sup>Eco</sup>-Cfa-His<sub>6</sub></i>  | This study |
| G23-1nt                           | <i>P<sub>IT</sub>-PurF<sup>Eco</sup></i>                      | This study |
| G24-1                             | <i>P<sub>IT</sub>-His<sub>6</sub>-Gsk<sup>Eco</sup></i>       | This study |
| G25-1Sumo                         | <i>P<sub>IT</sub>-His<sub>6</sub>-Sumo-PyrH<sup>Eco</sup></i> | This study |
| G26-1                             | <i>P<sub>IT</sub>-His<sub>6</sub>-Cmk<sup>Eco</sup></i>       | This study |
| G27-1nt                           | <i>P<sub>IT</sub>-PurA<sup>Eco</sup></i>                      | This study |
| G28-1                             | <i>P<sub>IT</sub>-His<sub>6</sub>-PurB<sup>Eco</sup></i>      | This study |
| G29-1                             | <i>P<sub>IT</sub>-His<sub>6</sub>-PurC<sup>Eco</sup></i>      | This study |
| G30-1Sumo                         | <i>P<sub>IT</sub>-His<sub>6</sub>-Sumo-GuaB<sup>Eco</sup></i> | This study |
| G43-1                             | <i>P<sub>IT</sub>-His<sub>6</sub>-Idh<sup>Eco</sup></i>       | This study |
| G45-1                             | <i>P<sub>IT</sub>-His<sub>6</sub>-Pgk<sup>Eco</sup></i>       | This study |
| G46-1                             | <i>P<sub>IT</sub>-His<sub>6</sub>-GpmA<sup>Eco</sup></i>      | This study |
| G53-1                             | <i>P<sub>IT</sub>-His<sub>6</sub>-Mpl<sup>Eco</sup></i>       | This study |
| G55-1                             | <i>P<sub>IT</sub>-His<sub>6</sub>-PurD<sup>Eco</sup></i>      | This study |
| G61-1                             | <i>P<sub>IT</sub>-His<sub>6</sub>-Ndk<sup>Eco</sup></i>       | This study |
| G62-1                             | <i>P<sub>IT</sub>-His<sub>6</sub>-Gmk<sup>Eco</sup></i>       | This study |

**Supplementary Table 9: Strains**

| Strain # | Background                                                                                                                                                                                        | plasmid         | Source     |
|----------|---------------------------------------------------------------------------------------------------------------------------------------------------------------------------------------------------|-----------------|------------|
| ML006    | MG1655                                                                                                                                                                                            |                 |            |
| ML2907   | MG1655 <i>rpoZ</i> (WT)- <i>kanR</i> , <i>rpoC</i> (WT)- <i>tetAR</i>                                                                                                                             |                 | 17         |
| ML2908   | MG1655 <i>rpoZ</i> Δ2-5- <i>kanR</i> , <i>rpoC</i> R362A R417A K615A N680A K681A- <i>tetAR</i>                                                                                                    |                 | 17         |
| ML2909   | F <sup>-</sup> , <i>glnX44</i> (AS), λ <sup>-</sup> , <i>cysJ43</i> , <i>argA21</i> , <i>lysA22</i> , <i>rpsL104</i> , <i>malT1</i> (λ <sup>R</sup> ), <i>xyl-7</i> , <i>mtlA2</i> , <i>thiE1</i> |                 | 34         |
| ML2912   | MG1655 <i>purF</i> R46A                                                                                                                                                                           |                 | This study |
| ML2914   | ML2907                                                                                                                                                                                            | pR1-1His        | This study |
| ML2915   | ML2907                                                                                                                                                                                            | pR1-1His(D275G) | This study |
| ML2916   | ML2908                                                                                                                                                                                            | pR1-1His        | This study |
| ML2917   | ML2908                                                                                                                                                                                            | pR1-1His(D275G) | This study |
| ML2920   | ML006                                                                                                                                                                                             | pR1-1His        | This study |
| ML2921   | ML006                                                                                                                                                                                             | pR1-1His(D275G) | This study |
| ML2924   | ML2912                                                                                                                                                                                            | pR1-1His        | This study |
| ML2926   | BL21(DE3)                                                                                                                                                                                         | pG1-2           | This study |
| ML2927   | BL21(DE3)                                                                                                                                                                                         | pG9-1           | This study |
| ML2928   | BL21(DE3)                                                                                                                                                                                         | pG10-1          | This study |
| ML2929   | BL21(DE3)                                                                                                                                                                                         | pG13-1          | This study |
| ML2930   | BL21(DE3)                                                                                                                                                                                         | pG15-1          | This study |
| ML2931   | BL21(DE3)                                                                                                                                                                                         | pG19-1          | This study |
| ML2932   | BL21(DE3)                                                                                                                                                                                         | pG20-1          | This study |
| ML2933   | BL21(DE3)                                                                                                                                                                                         | pG21-1          | This study |
| ML2934   | BL21(DE3)                                                                                                                                                                                         | pG23-1Cfa       | This study |
| ML2935   | BL21(DE3)                                                                                                                                                                                         | pG23-1nt        | This study |
| ML2940   | BL21(DE3)                                                                                                                                                                                         | pG24-1          | This study |
| ML2941   | BL21(DE3)                                                                                                                                                                                         | pG25-1Sumo      | This study |
| ML2942   | BL21(DE3)                                                                                                                                                                                         | pG26-1          | This study |
| ML2943   | BL21(DE3)                                                                                                                                                                                         | pG27-1nt        | This study |
| ML2944   | BL21(DE3)                                                                                                                                                                                         | pG28-1          | This study |
| ML2945   | BL21(DE3)                                                                                                                                                                                         | pG29-1          | This study |
| ML2946   | BL21(DE3)                                                                                                                                                                                         | pG30-1Sumo      | This study |
| ML2947   | BL21(DE3)                                                                                                                                                                                         | pG43-1          | This study |
| ML2948   | BL21(DE3)                                                                                                                                                                                         | pG45-1          | This study |
| ML2949   | BL21(DE3)                                                                                                                                                                                         | pG46-1          | This study |
| ML2950   | BL21(DE3)                                                                                                                                                                                         | pG53-1          | This study |
| ML2951   | BL21(DE3)                                                                                                                                                                                         | pG55-1          | This study |
| ML2952   | BL21(DE3)                                                                                                                                                                                         | pG61-1          | This study |
| ML2953   | BL21(DE3)                                                                                                                                                                                         | pG62-1          | This study |

## Supplementary References

- 1 Kanjee, U., Gutsche, I., Ramachandran, S. & Houry, W. A. The enzymatic activities of the *Escherichia coli* basic aliphatic amino acid decarboxylases exhibit a pH zone of inhibition. *Biochemistry* **50**, 9388-9398, doi:10.1021/bi201161k (2011).
- 2 Hochstadt-Ozer, J. & Cashel, M. The regulation of purine utilization in bacteria. V. Inhibition of purine phosphoribosyltransferase activities and purine uptake in isolated membrane vesicles by guanosine tetraphosphate. *J Biol Chem.* **247**, 7067-7072 (1972).
- 3 Maurizi, M. R. & Rasulova, F. Degradation of L-glutamate dehydrogenase from *Escherichia coli*: allosteric regulation of enzyme stability. *Arch Biochem Biophys.* **397**, 206-216, doi:10.1006/abbi.2001.2703 (2002).
- 4 Fast, R. & Skold, O. Biochemical mechanism of uracil uptake regulation in *Escherichia coli* B. Allosteric effects on uracil phosphoribosyltransferase under stringent conditions. *J Biol Chem.* **252**, 7620-7624 (1977).
- 5 Jensen, K. F. & Mygind, B. Different oligomeric states are involved in the allosteric behavior of uracil phosphoribosyltransferase from *Escherichia coli*. *Eur J Biochem.* **240**, 637-645 (1996).
- 6 Gallant, J., Irr, J. & Cashel, M. The mechanism of amino acid control of guanylate and adenylate biosynthesis. *J Biol Chem.* **246**, 5812-5816 (1971).
- 7 Mitkevich, V. A. *et al.* Thermodynamic characterization of ppGpp binding to EF-G or IF2 and of initiator tRNA binding to free IF2 in the presence of GDP, GTP, or ppGpp. *J Mol Biol.* **402**, 838-846, doi:10.1016/j.jmb.2010.08.016 (2010).
- 8 Rojas, A. M., Ehrenberg, M., Andersson, S. G. E. & Kurland, C. G. ppGpp inhibition of elongation factors Tu, G and Ts during polypeptide synthesis. *Mol Gen Genet.* **197**, 36-45 (1984).
- 9 Bharat, A. & Brown, E. D. Phenotypic investigations of the depletion of EngA in *Escherichia coli* are consistent with a role in ribosome biogenesis. *FEMS Microbiol Lett.* **353**, 26-32 (2014).
- 10 Milon, P. *et al.* The nucleotide-binding site of bacterial translation initiation factor 2 (IF2) as a metabolic sensor. *Proc Natl Acad Sci USA* **103**, 13962-13967, doi:10.1073/pnas.0606384103 (2006).
- 11 Fan, H., Hahm, J., Diggs, S., Perry, J. J. & Blaha, G. Structural and functional analysis of BipA, a regulator of virulence in enteropathogenic *Escherichia coli*. *J Biol Chem.* **290**, 20856-20864, doi:10.1074/jbc.M115.659136 (2015).
- 12 Kuroda, A., Murphy, H., Cashel, M. & Kornberg, A. Guanosine tetra- and pentaphosphate promote accumulation of inorganic polyphosphate in *Escherichia coli*. *J Biol Chem.* **272**, 21240-21243 (1997).
- 13 Persky, N. S., Ferullo, D. J., Cooper, D. L., Moore, H. R. & Lovett, S. T. The ObgE/CgtA GTPase influences the stringent response to amino acid starvation in *Escherichia coli*. *Mol Microbiol.* **73**, 253-266, doi:10.1111/j.1365-2958.2009.06767.x (2009).
- 14 Morton, D. P. & Parsons, S. M. Inhibition of ATP phosphoribosyltransferase by AMP and ADP in the absence and presence of histidine. *Arch Biochem Biophys.* **181**, 643-648 (1977).
- 15 Kanjee, U. *et al.* Linkage between the bacterial acid stress and stringent responses: the structure of the inducible lysine decarboxylase. *EMBO J.* **30**, 931-944, doi:10.1038/emboj.2011.5 (2011).

- 16 Paul, B. J. *et al.* DksA: a critical component of the transcription initiation machinery that potentiates the regulation of rRNA promoters by ppGpp and the initiating NTP. *Cell* **118**, 311-322, doi:10.1016/j.cell.2004.07.009 (2004).
- 17 Ross, W. *et al.* ppGpp Binding to a site at the RNAP-DksA interface accounts for its dramatic effects on transcription initiation during the stringent response. *Mol Cell*. **62**, 811-823, doi:10.1016/j.molcel.2016.04.029 (2016).
- 18 Zuo, Y., Wang, Y. & Steitz, T. A. The mechanism of *E. coli* RNA polymerase regulation by ppGpp is suggested by the structure of their complex. *Mol Cell*. **50**, 430-436, doi:10.1016/j.molcel.2013.03.020 (2013).
- 19 Sarubbi, E. *et al.* Characterization of the *spoT* gene of *Escherichia coli*. *J Biol Chem*. **264**, 15074-15082 (1989).
- 20 Wang, J. D., Sanders, G. M. & Grossman, A. D. Nutritional control of elongation of DNA replication by (p)ppGpp. *Cell* **128**, 865-875, doi:10.1016/j.cell.2006.12.043 (2007).
- 21 Zhang, Y., Zbornikova, E., Rejman, D. & Gerdes, K. Novel (p)ppGpp binding and metabolizing proteins of *Escherichia coli*. *MBio* **9**, doi:ARTN e02188-17 10.1128/mBio.02188-17 (2018).
- 22 Kristensen, O., Ross, B. & Gajhede, M. Structure of the PPX/GPPA phosphatase from *Aquifex aeolicus* in complex with the alarmone ppGpp. *J Mol Biol*. **375**, 1469-1476, doi:10.1016/j.jmb.2007.11.073 (2008).
- 23 Buglino, J., Shen, V., Hakimian, P. & Lima, C. D. Structural and biochemical analysis of the Obg GTP binding protein. *Structure* **10**, 1581-1592 (2002).
- 24 Kihira, K. *et al.* Crystal structure analysis of the translation factor RF3 (release factor 3). *FEBS Lett*. **586**, 3705-3709, doi:10.1016/j.febslet.2012.08.029 (2012).
- 25 Kumar, V. *et al.* Structure of BipA in GTP form bound to the ratcheted ribosome. *Proc Natl Acad Sci USA* **112**, 10944-10949, doi:10.1073/pnas.1513216112 (2015).
- 26 Mechold, U., Potrykus, K., Murphy, H., Murakami, K. S. & Cashel, M. Differential regulation by ppGpp versus pppGpp in *Escherichia coli*. *Nucleic Acids Res* **41**, 6175-6189, doi:10.1093/nar/gkt302 (2013).
- 27 Cuthbert, B. J. *et al.* Dissection of the molecular circuitry controlling virulence in *Francisella tularensis*. *Gene Dev*. **31**, 1549-1560, doi:10.1101/gad.303701.117 (2017).
- 28 Rymer, R. U. *et al.* Binding mechanism of metal-NTP substrates and stringent-response alarmones to bacterial DnaG-type primases. *Structure* **20**, 1478-1489, doi:10.1016/j.str.2012.05.017 (2012).
- 29 Steinchen, W. *et al.* Catalytic mechanism and allosteric regulation of an oligomeric (p)ppGpp synthetase by an alarmone. *Proc Natl Acad Sci USA* **112**, 13348-13353, doi:10.1073/pnas.1505271112 (2015).
- 30 Liu, K. *et al.* Molecular mechanism and evolution of guanylate kinase regulation by (p)ppGpp. *Mol Cell*. **57**, 735-749, doi:10.1016/j.molcel.2014.12.037 (2015).
- 31 Datsenko, K. A. & Wanner, B. L. One-step inactivation of chromosomal genes in *Escherichia coli* K-12 using PCR products. *Proc Natl Acad Sci USA* **97**, 6640-6645, doi:10.1073/pnas.120163297 (2000).
- 32 Ferullo, D. J. & Lovett, S. T. The stringent response and cell cycle arrest in *Escherichia coli*. *PLoS Genet*. **4**, e1000300, doi:10.1371/journal.pgen.1000300 (2008).
- 33 Stevens, A. J. *et al.* Design of a split intein with exceptional protein splicing activity. *J Am Chem Soc*. **138**, 2162-2165, doi:10.1021/jacs.5b13528 (2016).
- 34 Taylor, A. L. Current linkage map of *Escherichia coli*. *Bacteriol Rev*. **34**, 155-175 (1970).
